# Supplementary material for: Incomplete meiotic sex chromosome inactivation in the domestic dog
Source: PubMed Central journal article supplement (PMC4399420; doi:10.1186/s12864-015-1501-9), 2015-04-12
Supplement: 12864_2015_1501_MOESM1_ESM.pdf [file 12864_2015_1501_MOESM1_ESM.pdf]

Table S1: Analyses of dog germ cell purity

|       | <b>Spermatocytes</b> | Spermatids | Cytoplasm | Others    | <b>Spermatids</b>  | Spermatocytes | Cytoplasm  | Others    |
|-------|----------------------|------------|-----------|-----------|--------------------|---------------|------------|-----------|
| Dog 4 | 86                   | 16         | 2         | 3         | 140                | 2             | 17         | 6         |
| Dog5  | 95                   | 18         | 4         | 9         | 101                | 1             | 12         | 8         |
| Dog6  | 94                   | 9          | 1         | 7         | 116                | 1             | 15         | 4         |
| Tot.  | 265 <b>(79.3%)</b>   | 43 (12.9%) | 7 (2.1%)  | 19 (5.7%) | 357 <b>(84.4%)</b> | 4 (0.9%)      | 44 (10.4%) | 18 (4.3%) |

Table S2: Relative expression levels of spermatocyte genes in mouse and dog spermatids

| Spermatocyte gene  | Dog log2 fold change<br>spt/spc | Mouse log2 fold change<br>spt/spc |
|--------------------|---------------------------------|-----------------------------------|
| <i>Sycp1/SYCP1</i> | -0.46                           | -0.42                             |
| <i>Sycp2/SYCP2</i> | -2.88                           | -1.38                             |
| <i>Sycp3/SYCP3</i> | -1.07                           | -1.11                             |
| Average            | -1.47                           | -0.97                             |

Table S3: Relative expression levels of spermatid genes in mouse and dog spermatids

| Spermatid gene   | Dog log2 fold change<br>spt/spc | Mouse log2 fold change<br>spt/spc |
|------------------|---------------------------------|-----------------------------------|
| <i>Tnp1/TNP1</i> | 3.76                            | 3.54                              |
| <i>Tnp2/TNP2</i> | 4.02                            | 3.51                              |
| <i>Prm1/PRM1</i> | n.a.                            | 3.51                              |
| <i>Prm2/PRM2</i> | 3.86                            | 3.80                              |
| <i>Prm3/PRM3</i> | 2.75                            | 3.18                              |
| Average          | 3.60                            | 3.51                              |

Table S4: Comparison between Cufflinks and edgeR results

|           | # diff. expressed genes | # in common (%) | # sign and >1.5 fold up | # in common (%) | # sign and >1.5 fold down | # in common (%) | # sign and >1.5 fold up X | # in common (%) | #sign and >1.5 fold down X | # in common (%) |
|-----------|-------------------------|-----------------|-------------------------|-----------------|---------------------------|-----------------|---------------------------|-----------------|----------------------------|-----------------|
| Cufflinks | 9679                    | 8661 (89)       | 4632                    | 4323 (94)       | 4220                      | 4094 (97)       | 207                       | 197 (95)        | 126                        | 116 (92)        |
| edgeR     | 9904                    | 8661 (87)       | 4828                    | 4323 (90)       | 4919                      | 4094 (83)       | 224                       | 197 (88)        | 160                        | 116 (73)        |

Table S5: Differentially expressed dog X-linked genes homologous to mouse and/or human multicopy genes

| <b>Down in spermatids</b> | <b>Up in spermatids</b> |
|---------------------------|-------------------------|
| <i>DDX26B</i>             | <i>COL4A6</i>           |
| <i>MAGEB1</i>             | <i>GLRA2</i>            |
| <i>MAGEB4</i>             | <i>GLRA4</i>            |
| <i>MAGED1</i>             | <i>H2BFWT</i>           |
| <i>MAOB</i>               | <i>MAGEB10</i>          |
| <i>NGFRAP1</i>            | <i>MAGEB5</i>           |
| <i>RAB9A</i>              | <i>MAOA</i>             |
| <i>SHROOM2</i>            | <i>MID2</i>             |
| <i>SLC9A6</i>             | <i>PHKA2</i>            |
| <i>SSX5</i>               | <i>PRPS2</i>            |
| <i>TCEAL4</i>             | <i>RAB9B</i>            |
| <i>ZNF182</i>             | <i>SCML1</i>            |
| <i>ZNF185</i>             | <i>SCML2</i>            |
| <i>ZNF280C</i>            | <i>SPACA5</i>           |
|                           | <i>TGIF2LX</i>          |
|                           | <i>ZCCHC12</i>          |
|                           | <i>ZNF711</i>           |
|                           | <i>ZNF81</i>            |

Table S6: Average FPKM values of gene expression in dog

|               | Genome | Chr 1 | X     | PAR  |
|---------------|--------|-------|-------|------|
| SPERMATOCYTES | 27.05  | 28.31 | 6.15  | 2.46 |
| SPERMATIDS    | 37.92  | 35.18 | 22.87 | 2.71 |

Table S7: Expression of *SLC25A* variants in spermatocytes and spermatids of mouse man and dog

| DOG (RNA-seq)   |        |            |            | MOUSE (RNA-seq) |            |            | MAN (microarray) |        |        |
|-----------------|--------|------------|------------|-----------------|------------|------------|------------------|--------|--------|
| gene            | chr    | spc (FPKM) | spt (FPKM) | chr             | spc (FPKM) | spt (FPKM) | chr              | spc    | spt    |
| <i>SLC25A4</i>  | 16     | 5.77       | 2.06       | 8               | 6.18       | 2.81       | 4                | 26.44  | 13.83  |
| <i>SLC25A5</i>  | X      | 4.08       | 1.77       | X               | 8.50       | 2.38       | X                | 159.86 | 297.73 |
| <i>SLC25A6</i>  | X(PAR) | 47.19      | 18.11      | -               | -          | -          | X(PAR)           | 113.95 | 163.43 |
| <i>SLC25A31</i> | 19     | 34.76      | 20.54      | 3               | 34.10      | 16.26      | 4                | 265.19 | 75.93  |

Table S8: Molecular and cellular functions associated with X-linked genes upregulated in spermatids of dog and mouse

| Category                                   | p-value           | Genes                                                           |
|--------------------------------------------|-------------------|-----------------------------------------------------------------|
| Cell Morphology                            | 9.44E-04-4.66E-02 | <i>PHEX,AKAP4,PAK3,CDK16,TAF7L,MAOA,HMGB3</i>                   |
| DNA Replication, Recombination, and Repair | 2.08E-03-3.94E-02 | <i>HUWE1,CUL4B,CETN2,UBE2A,TEX11,ERCC6L</i>                     |
| Cell Signaling                             | 2.37E-03-4.33E-02 | <i>PRKX,TAF1,AKAP4,PDK3,MED12,MED14</i>                         |
| Post-Translational Modification            | 2.37E-03-3.17E-02 | <i>HUWE1,CDKL5,OGT,PRKX,TAF1,UBE2A,RLIM,UBA1,ASB9,PDK3,MAOA</i> |
| Protein Synthesis                          | 2.37E-03-3.56E-02 | <i>CUL4B,PRKX,TAF1,RLIM,EIF1AX,ASB9,PDK3</i>                    |
| Molecular Transport                        | 3.49E-03-1.99E-02 | <i>PHEX,SLC35A2,RPGR,MAOA</i>                                   |
| Nucleic Acid Metabolism                    | 3.49E-03-1.99E-02 | <i>CTPS2,SLC35A2,RPGR</i>                                       |
| Small Molecule Biochemistry                | 3.49E-03-4.33E-02 | <i>OGT,CTPS2,SLC35A2,RPGR,SMS,MAOA</i>                          |
| Carbohydrate Metabolism                    | 4.02E-03-2.39E-02 | <i>OGT,SLC35A2</i>                                              |
| Cell Death and Survival                    | 4.02E-03-4.98E-02 | <i>HUWE1,OGT,UXT,ATP11C,PAK3,BGN,SH3KBP1,MAOA</i>               |
| Cell-To-Cell Signaling and Interaction     | 4.02E-03-4.71E-02 | <i>CDKL5,OGT,OPHN1,PAK3,RLIM,BGN,MAOA</i>                       |
| Cellular Assembly and Organization         | 4.02E-03-3.94E-02 | <i>OPHN1,PAK3,OFD1,TEX11,MAOA</i>                               |
| Cellular Development                       | 4.02E-03-4.71E-02 | <i>CUL4B,RLIM,BGN,USP9X,CDK16,ZFX,TEX11,TAF7L</i>               |
| Cellular Function and Maintenance          | 4.02E-03-1.99E-02 | <i>PHEX,OPHN1,OFD1,MAOA</i>                                     |
| Cellular Growth and Proliferation          | 4.02E-03-4.33E-02 | <i>CUL4B,CETN2,RLIM,BGN</i>                                     |
| Drug Metabolism                            | 4.02E-03-2.39E-02 | <i>MAOA</i>                                                     |
| Gene Expression                            | 4.02E-03-1.72E-02 | <i>MED12,MED14,TXLNG</i>                                        |
| Cell Cycle                                 | 8.01E-03-3.17E-02 | <i>RLIM,ERCC6L</i>                                              |
| Cellular Movement                          | 8.01E-03-4.11E-02 | <i>CDKL5,AKAP4,TAF7L,MAOA</i>                                   |
| Energy Production                          | 8.01E-03-1.6E-02  | <i>MAOA</i>                                                     |
| Lipid Metabolism                           | 1.6E-02-1.6E-02   | <i>SLC35A2</i>                                                  |
| Protein Degradation                        | 3.06E-02-3.06E-02 | <i>CUL4B,RLIM,ASB9</i>                                          |
| Amino Acid Metabolism                      | 3.17E-02-3.17E-02 | <i>SMS</i>                                                      |
| RNA Post-Transcriptional Modification      | 4.71E-02-4.71E-02 | <i>CSTF2</i>                                                    |

Table S9: X-linked genes upregulated in spermatids of mouse, human, and dog

|                          | Gene           | Mouse knockout                                                                                                                                                            | Molecular function                                                                                                                              | Putative function in spermatogenesis     |
|--------------------------|----------------|---------------------------------------------------------------------------------------------------------------------------------------------------------------------------|-------------------------------------------------------------------------------------------------------------------------------------------------|------------------------------------------|
| Structural components    | <i>AKAP14</i>  | -                                                                                                                                                                         | A-kinase-anchoring protein                                                                                                                      | Ciliary beat frequency [1]               |
|                          | <i>AKAP4</i>   | immotile sperm [2]                                                                                                                                                        | A-kinase-anchoring protein                                                                                                                      | Fibrous sheet formation                  |
|                          | <i>CDK16</i>   | malformed sperm , reduced motility [3]                                                                                                                                    | Cyclin dependent kinase                                                                                                                         | Annulus formation                        |
|                          | <i>OFD1</i>    | embryonic lethal [4] Mutations in the human ortholog are associated with Oral–facial–digital type I (OFDI; MIM 311200) syndrome and Simpson-Golabi-Behmel syndrome type 2 | Centrosome associated proteins, involved in Cilia formation [5]. Removal through autophagy is essential for proper cilia function [6]           |                                          |
|                          | <i>CYLC1</i>   | -                                                                                                                                                                         | Cyclin, basic protein, structural component of cytoskeleton                                                                                     | Component of sperm head cytoskeleton [7] |
| Ubiquitin pathway        | <i>ASB12</i>   | -                                                                                                                                                                         | The ankyrin repeat and SOCS box (ASB) family, forms E3 complex with Cul5-Rbx2                                                                   | Ubiquitylation [8]                       |
|                          | <i>CUL4B</i>   | embryonic lethal, epiblast-specific knockout is viable, reproduction not analysed [9]                                                                                     | Component of E3 ligase complex                                                                                                                  | Ubiquitylation                           |
|                          | <i>UBA1</i>    | -                                                                                                                                                                         | Ubiquitin-activating enzyme                                                                                                                     | Ubiquitylation                           |
| Mitochondrial enzymes    | <i>DUSP21</i>  | -                                                                                                                                                                         | Mitochondrial membrane phosphatase [10]                                                                                                         |                                          |
|                          | <i>MAOA</i>    | fertile, aggressive behaviour [11]                                                                                                                                        | Monoamine oxidase A degrades serotonin and norepinephrine. Mitochondrial enzyme                                                                 |                                          |
| Transcription regulation | <i>TAF1</i>    | -                                                                                                                                                                         | Largest subunit of TFIID, transcriptional regulation                                                                                            |                                          |
|                          | <i>TAF7L</i>   | reduced sperm numbers and quality, fertile [12]                                                                                                                           | Regulation of transcription program together with TAF1                                                                                          |                                          |
|                          | <i>IQSEC2</i>  | human mutations cause nonsyndromic intellectual disability [13]                                                                                                           | Guanine nucleotide exchange factor for the ADP-ribosylation factor family of small GTPases, involved in membrane trafficking and actin dynamics |                                          |
|                          | <i>TBC1D25</i> | -                                                                                                                                                                         | Rab GTPase-activating protein involved in autophagy [14]                                                                                        |                                          |
|                          | <i>CDKL5</i>   | neurodevelopmental disorder, fertile [15]                                                                                                                                 | Cyclin-dependent kinase-like                                                                                                                    |                                          |
|                          | <i>CXORF27</i> | -                                                                                                                                                                         | Huntingtin interacting protein with histone fold [16]                                                                                           |                                          |

|  |               |                                  |                                                                                   |  |
|--|---------------|----------------------------------|-----------------------------------------------------------------------------------|--|
|  | <i>GSPT2</i>  | -                                | Polypeptide release factor (translation termination) [17]                         |  |
|  | <i>TEX13A</i> | -                                | Testis-specific gene [18] possibly involved in mRNA processing [19]               |  |
|  | <i>PPEF1</i>  | fertile, no clear phenotype [20] | Calcium binding phosphatase                                                       |  |
|  | <i>RIBC1</i>  | -                                | The RIB43A domain with coiled coils 1 ( <i>RIBC1</i> ) gene with unknown function |  |
|  | <i>TEX28</i>  | -                                | Testis-specific single exon gene of unknown function [21]                         |  |

## References

1. Kultgen PL, Byrd SK, Ostrowski LE, Milgram SL. Characterization of an A-kinase anchoring protein in human ciliary axonemes. *Mol Biol Cell.* 2002;13:4156-66.
2. Miki K, Willis WD, Brown PR, Goulding EH, Fulcher KD, Eddy EM. Targeted disruption of the *Akap4* gene causes defects in sperm flagellum and motility. *Dev Biol.* 2002;248:331-42.
3. Mikolcevic P, Rainer J, Geley S. Orphan kinases turn eccentric: a new class of cyclin Y-activated, membrane-targeted CDKs. *Cell Cycle.* 2012;11:3758-68.
4. Ferrante MI, Zullo A, Barra A, Bimonte S, Messaddeq N, Studer M et al. Oral-facial-digital type I protein is required for primary cilia formation and left-right axis specification. *Nat Genet.* 2006;38:112-7.
5. D'Angelo A, De Angelis A, Avallone B, Piscopo I, Tammaro R, Studer M et al. *Ofd1* controls dorso-ventral patterning and axoneme elongation during embryonic brain development. *PLoS One.* 2012;7:e52937.
6. Tang Z, Lin MG, Stowe TR, Chen S, Zhu M, Stearns T et al. Autophagy promotes primary ciliogenesis by removing OFD1 from centriolar satellites. *Nature.* 2013;502:254-7.
7. Hess H, Heid H, Franke WW. Molecular characterization of mammalian cylicin, a basic protein of the sperm head cytoskeleton. *J Cell Biol.* 1993;122:1043-52.
8. Kohroki J, Nishiyama T, Nakamura T, Masuho Y. ASB proteins interact with Cullin5 and Rbx2 to form E3 ubiquitin ligase complexes. *FEBS Lett.* 2005;579:6796-802.
9. Liu L, Yin Y, Li Y, Prevedel L, Lacy EH, Ma L et al. Essential role of the CUL4B ubiquitin ligase in extra-embryonic tissue development during mouse embryogenesis. *Cell Res.* 2012;22:1258-69.
10. Rardin MJ, Wiley SE, Murphy AN, Pagliarini DJ, Dixon JE. Dual specificity phosphatases 18 and 21 target to opposing sides of the mitochondrial inner membrane. *J Biol Chem.* 2008;283:15440-50.

11. Cases O, Seif I, Grimsby J, Gaspar P, Chen K, Pournin S et al. Aggressive behavior and altered amounts of brain serotonin and norepinephrine in mice lacking MAOA. *Science*. 1995;268:1763-6.
12. Cheng Y, Buffone MG, Kouadio M, Goodheart M, Page DC, Gerton GL et al. Abnormal sperm in mice lacking the *Taf71* gene. *Mol Cell Biol*. 2007;27:2582-9.
13. Shoubridge C, Walikonis RS, Gez J, Harvey RJ. Subtle functional defects in the Arf-specific guanine nucleotide exchange factor IQSEC2 cause non-syndromic X-linked intellectual disability. *Small GTPases*. 2010;1:98-103.
14. Popovic D, Akutsu M, Novak I, Harper JW, Behrends C, Dikic I. Rab GTPase-activating proteins in autophagy: regulation of endocytic and autophagy pathways by direct binding to human ATG8 modifiers. *Mol Cell Biol*. 2012;32:1733-44.
15. Wang IT, Allen M, Goffin D, Zhu X, Fairless AH, Brodtkin ES et al. Loss of CDKL5 disrupts kinome profile and event-related potentials leading to autistic-like phenotypes in mice. *Proc Natl Acad Sci U S A*. 2012;109:21516-21.
16. Marino-Ramirez L, Hsu B, Baxevanis AD, Landsman D. The Histone Database: a comprehensive resource for histones and histone fold-containing proteins. *Proteins*. 2006;62:838-42.
17. Le Goff C, Zemlyanko O, Moskalenko S, Berkova N, Inge-Vechtsov S, Philippe M et al. Mouse GSPT2, but not GSPT1, can substitute for yeast eRF3 in vivo. *Genes Cells*. 2002;7:1043-57.
18. Wang PJ, McCarrey JR, Yang F, Page DC. An abundance of X-linked genes expressed in spermatogonia. *Nat Genet*. 2001;27:422-6.
19. Nguyen CD, Mansfield RE, Leung W, Vaz PM, Loughlin FE, Grant RP et al. Characterization of a family of RanBP2-type zinc fingers that can recognize single-stranded RNA. *J Mol Biol*. 2011;407:273-83.
20. Ramulu P, Kennedy M, Xiong WH, Williams J, Cowan M, Blesh D et al. Normal light response, photoreceptor integrity, and rhodopsin dephosphorylation in mice lacking both protein phosphatases with EF hands (PPEF-1 and PPEF-2). *Mol Cell Biol*. 2001;21:8605-14.
21. Hanna MC, Platts JT, Kirkness EF. Identification of a gene within the tandem array of red and green color pigment genes. *Genomics*. 1997;43:384-6.
